# **Pyrite formation from FeS and H<sub>2</sub>S is mediated by a novel type of microbial energy metabolism**

Joana Thiel<sup>1</sup>, James Byrne<sup>2</sup>, Andreas Kappler<sup>2</sup>, Bernhard Schink<sup>1</sup>, Michael Pester<sup>1,3</sup>

<sup>1</sup> *University of Konstanz, Universitätsstraße 10, 78464 Konstanz, Germany*

<sup>2</sup> *Eberhardt Karls University of Tübingen, Hölderlinstraße 12, 72074 Tübingen, Germany*

<sup>3</sup> *Leibniz Institute DSMZ – German Culture Collection for Microorganisms and Cell Cultures, Inhoffenstraße 7B, 38124 Braunschweig, Germany*

Short title: Microbial pyrite formation

Keywords: Sulfur cycle | Iron-sulfur minerals | biogenic mineral transformation | syntrophy | deep biosphere | Origin of Life

Corresponding author: Michael Pester

Mail: Michael.Pester@dsmz.de

Phone: +49 531 2616237

Fax: +49 531 2616418

## Microbial pyrite formation

### Abstract

The exergonic reaction of FeS with H<sub>2</sub>S to form FeS<sub>2</sub> (pyrite) and H<sub>2</sub> was postulated to have operated as an early form of energy metabolism on primordial Earth. Since the Archean, sedimentary pyrite formation played a major role in the global iron and sulfur cycles, with direct impact on the redox chemistry of the atmosphere. To date, pyrite formation was considered a purely geochemical reaction. Here, we present microbial enrichment cultures, which grew with FeS, H<sub>2</sub>S, and CO<sub>2</sub> as their sole substrates to produce FeS<sub>2</sub> and CH<sub>4</sub>. Cultures grew over periods of three to eight months to cell densities of up to 2–9×10<sup>6</sup> cells mL<sup>-1</sup>. Transformation of FeS with H<sub>2</sub>S to FeS<sub>2</sub> was followed by <sup>57</sup>Fe Mössbauer spectroscopy and showed a clear biological temperature profile with maximum activity at 28°C and decreasing activities towards 4°C and 60°C. CH<sub>4</sub> was formed concomitantly with FeS<sub>2</sub> and exhibited the same temperature dependence. Addition of either penicillin or 2-bromoethanesulfonate inhibited both FeS<sub>2</sub> and CH<sub>4</sub> production, indicating a syntrophic coupling of pyrite formation to methanogenesis. This hypothesis was supported by a 16S rRNA gene-based phylogenetic analysis, which identified at least one archaeal and five bacterial species. The archaeon was closely related to the hydrogenotrophic methanogen *Methanospirillum stamsii* while the bacteria were most closely related to sulfate-reducing *Deltaproteobacteria*, as well as uncultured *Firmicutes* and *Actinobacteria*. We identified a novel type of microbial metabolism able to conserve energy from FeS transformation to FeS<sub>2</sub>, which may serve as a model for a postulated primordial iron-sulfur world.

## Microbial pyrite formation

### 43 Significance statement

44 Pyrite is the most abundant iron-sulfur mineral in sediments. Over geological times, its burial  
 45 controlled oxygen levels in the atmosphere and sulfate concentrations in seawater. Its  
 46 formation in sediments is so far considered a purely geochemical process that is at most  
 47 indirectly supported by microbial activity. We show that lithotrophic microorganisms can directly  
 48 transform FeS and H<sub>2</sub>S to FeS<sub>2</sub> and use this exergonic reaction as a novel form of energy  
 49 metabolism that is syntrophically coupled to methanogenesis. Our results provide insights into  
 50 a syntrophic relationship that could sustain part of the deep biosphere and lend support to the  
 51 iron-sulfur-world theory that postulated FeS transformation to FeS<sub>2</sub> as a key energy-delivering  
 52 reaction for life to emerge.

## Microbial pyrite formation

### 53 Introduction

54 With an annual formation of at least 5 million tons, pyrite ( $\text{FeS}_2$ ) is the thermodynamically  
 55 stable end product of iron compounds reacting with sulfide in reduced sediments, with the  
 56 latter being produced mainly by microbial sulfate reduction. Consequently, pyrite is the most  
 57 abundant iron-sulfur mineral on Earth's surface (1). Over geological times, burial of pyrite was  
 58 tightly intertwined with organic matter preservation in reduced sediments (2). These massive  
 59 reservoirs of reduced sulfur and carbon are being counterbalanced by the photosynthetically  
 60 produced oxygen in the Earth's atmosphere (2). Despite this importance of pyrite for Earth's  
 61 iron, sulfur, and carbon cycles as well as Earth's surface redox state, the mechanism of pyrite  
 62 formation in natural environments is still being debated (1). Currently, two mechanisms are  
 63 discussed to drive pyrite formation in sediments, which both preclude dissolution of  
 64 precipitated iron(II) monosulfide ( $\text{FeS}$ ) to an aqueous  $\text{FeS}$  intermediate. In the polysulfide  
 65 pathway,  $\text{FeS}_{\text{aq}}$  is attacked by nucleophilic polysulfide to form  $\text{FeS}_2$  (equ. 1). Alternatively,  
 66 pyrite may form from the reaction of  $\text{FeS}_{\text{aq}}$  with  $\text{H}_2\text{S}$  (equ. 2), which is known as the  $\text{H}_2\text{S}$   
 67 pathway or the Wächtershäuser reaction (1).

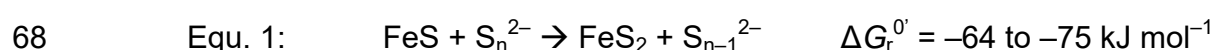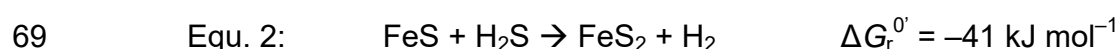

70 Using inorganic experimental systems, abiotic pyrite formation has been observed at  
 71 temperatures of 25–125°C (e.g. 1, 3). However, already trace amounts of organic compounds  
 72 containing aldehyde groups were reported to inhibit pyrite formation in such experiments (1, 4).  
 73 Absence of stringent control for such compounds may explain why many other studies with  
 74 abiotic systems did not observe pyrite formation at environmentally relevant temperatures (5-

## Microbial pyrite formation

11). On the other hand, pyrite formation is known to take place in the presence of organic matter and especially alive microorganisms in sediments (5, 12). Indeed, pyrite formation could be observed as a side reaction in pure and enrichment cultures of heterotrophic sulfate-reducing and chemolithotrophic sulfur-dismutating bacteria, with the assumption that these microorganisms provide mainly  $H_2S$  as a substrate for concomitant abiotic pyrite formation (13-15). In addition, a more complex involvement of microorganisms has been postulated that includes the support of nucleation of FeS minerals on bacterial cell surfaces (16). However, in all these studies biogenic pyrite formation has so far been understood only as an indirect abiotic process.

Pyrite formation according to equ. 2 provides reducing equivalents in the form of  $H_2$  that could be coupled to the reduction of  $CO_2$  to  $CH_4$  or more complex organic matter. Coupling of pyrite formation to methanogenesis has been proposed by Jørgensen and coworkers to be part of a cryptic sulfur cycle in deep marine sediments where it could support the enigmatic life forms of the deep biosphere (17). Coupling of this reaction to the synthesis of organic matter is the basis of the “iron-sulfur world” theory proposed by Wächtershäuser, by which pyrite formation is viewed as the central process that led to the transition from Fe-S surface-catalyzed synthesis of organic molecules to actual life on the primordial Earth (18-20). Here, we show for the first time that the reaction of FeS with  $H_2S$  to form  $FeS_2$  can be used by microorganisms to conserve energy for lithotrophic growth if syntrophically coupled to methanogenesis.

## Microbial pyrite formation

### 94 Results and Discussion

#### 95 Pyrite formation as a microbially catalyzed process

96 Mineral medium containing 5 mM FeS and 6 mM H<sub>2</sub>S as sole substrates and CO<sub>2</sub>/HCO<sub>3</sub><sup>-</sup> as  
 97 carbon source was inoculated with digested sewage sludge, freshwater or marine sediment  
 98 (Table S1) and incubated at 16°C or 28°C. Microbial activity was followed via methane  
 99 formation, and transfers were made every three to eight months, typically when the methane  
 100 content in the headspace approached a plateau. Of seven enrichments started, four exhibited  
 101 methane formation for more than ten transfers. The most active enrichment culture J5, which  
 102 was started from digested sewage sludge and incubated at 28°C, was characterized in more  
 103 detail after more than 20 transfers. On average, the methane content reached 0.7 mmol per L  
 104 of culture in J5. In contrast, no methane formation was observed in abiotic controls (Fig. 1A).  
 105 This was mirrored in the turnover of total H<sub>2</sub>S: While in culture J5 total H<sub>2</sub>S decreased over  
 106 time from approx. 6 mmol to 0.04–1.1 mmol per L of culture (Fig. S1), abiotic controls showed  
 107 a much less pronounced decline of total H<sub>2</sub>S (3.7 mmol residual H<sub>2</sub>S per L). The observed  
 108 decrease in the abiotic controls may be due to inorganic background reactions (see below).

109 Conversion of FeS solids was followed by <sup>57</sup>Fe Mössbauer spectrometry. After nearly seven  
 110 months of incubation, the Mössbauer spectrum of culture J5 was dominated by a FeS<sub>2</sub> doublet  
 111 (Fig. 1B), which corresponded to 53–63% of the iron-sulfur mineral phase (Table S2). In  
 112 contrast, no evidence of a singlet peak corresponding to FeS was present. In addition, a poorly  
 113 defined sextet feature was required to achieve a satisfactory fit of the Mössbauer spectrum.  
 114 This poorly defined sextet is best described as a metastable phase, which we have termed  
 115 FeS<sub>x</sub> in accordance with the notation used by Wan et al. (21), and represented 31–39% of the  
 116 remaining iron-sulfur minerals. Furthermore, a well-defined sextet with a hyperfine magnetic

## Microbial pyrite formation

field of 32 T was required to fit the data, which corresponded well to greigite ( $\text{Fe}_3\text{S}_4$ ) (22) and made up 7–8% of the remaining iron-sulfur minerals. Greigite is the sulfur isomorph of magnetite and was previously observed as an intermediate phase in the FeS conversion to pyrite in abiotic studies (23, 24).

FeS<sub>2</sub> formation in culture J5 was confirmed by X-ray diffraction analysis, which recovered all major XRD reflections of pyrite in the obtained XRD pattern (Fig. 2A). Since no indication of a parallel formation of the dimorph marcasite was evident from the XRD pattern, the recovered FeS<sub>2</sub> phase is referred to as pyrite from here on. Further support for pyrite formation in culture J5 was provided by scanning electron microscopy (SEM) coupled to energy-dispersive X-ray (EDX) spectroscopy. Here,  $\mu\text{m}$ -scale iron-sulfur crystals with a euhedral structure as typical of pyrite could be observed (Fig. 2B), which resembled the expected Fe:S ratio of 1:2 as revealed by EDX point measurements (Fig. S2).

In contrast to culture J5, the Mössbauer spectrum of the nearly seven-months-old abiotic control was dominated by a prominent FeS singlet peak (64% of iron-sulfur minerals). In addition, a poorly defined sextet corresponding to FeS<sub>x</sub> was required to achieve a satisfactory fit of the obtained data (36% of iron-sulfur minerals) (Fig. 1, Table S2). The abiotic conversion of FeS to FeS<sub>x</sub> most likely explains the observed decrease of total H<sub>2</sub>S in the abiotic control. Absence of pyrite formation in abiotic controls was further supported by the obtained XRD patterns (Fig. 2A). In addition, freshly prepared medium was also devoid of pyrite as evidenced by an overall disordered iron-sulfur mineral phase in SEM-EDX images without any euhedral crystals indicative of pyrite (Fig. 2B, Fig. S2).

To further support our hypothesis of biogenic pyrite formation in culture J5, we followed its iron-sulfur mineral transformation over a temperature gradient of 4–60°C. The maximum of pyrite

## Microbial pyrite formation

formation was evident at 28°C. Incubation at lower (16°C) or higher (46°C) temperatures resulted in decreased pyrite formation, with no pyrite formation at 4°C and 60°C (Fig. 3A and 3B, Table S2). While FeS was completely transformed to pyrite, greigite, and various FeS<sub>x</sub> phases at 16, 28, and 46°C, some residual FeS remained at 4°C and 60°C (Fig. 3A). The observed temperature profile of pyrite formation is typical of biologically catalyzed reactions centered on an optimum reaction temperature. In contrast, abiotic pyrite formation at temperatures of <100°C was shown to follow a sigmoidal temperature dependence (3).

### Microbial pyrite formation is a syntrophically coupled process

Methane formation closely followed the temperature-dependent activity profile of pyrite formation (Fig. 3C) suggesting metabolic coupling of both processes. This hypothesis was further explored in an inhibition experiment using either penicillin G as a generic inhibitor of bacterial cell wall synthesis or 2-bromoethanesulfonate (BES) as a specific inhibitor of hydrogenotrophic methanogenesis (25). BES inhibited both methane and pyrite formation completely (Fig. 1C and 1D). We interpret this as a direct coupling of biogenic pyrite formation to hydrogenotrophic methanogenesis. In support of this hypothesis, penicillin inhibited both pyrite and methane formation as well (Fig. 1C and 1D). Here, methane formation ceased after an initial production of 0.15 mmol per L of culture. The latter is explained by penicillin's mode of action, which inhibits growth of bacteria but not their initial metabolic activity. Interestingly, a corresponding small amount of pyrite was not observed in this experiment but rather a partial FeS transformation to various FeS<sub>x</sub> phases and greigite (Fig. 1D, Table S2). This indicates that methanogenesis could receive reducing equivalents also from these iron-sulfur mineral transformations. Further support for syntrophic coupling of pyrite formation to methanogenesis was provided by a third inhibition experiment in which penicillin addition was supplemented by



# Microbial pyrite formation

79% H<sub>2</sub> in the headspace. Also here, pyrite was not formed (Table S2) while methane production was stimulated more than 10-fold by the added H<sub>2</sub> (>10 mmol per L of culture). This clearly showed that methanogenesis could be uncoupled from pyrite formation and is essential for the latter, most likely to keep H<sub>2</sub> or another electron carrier at a low level, to make pyrite formation energetically more favorable as is typically observed in syntrophic processes (26). Although we could not identify the exact electron carrier, molecular H<sub>2</sub> is the most likely candidate because it was previously observed in abiotic experiments of pyrite formation from FeS and H<sub>2</sub>S (3, 27). Irrespective of the actual electron carrier, syntrophic coupling of pyrite formation to methanogenesis would be exergonic and result in an expected ratio of formed pyrite to methane of 4:1 (equ. 5).

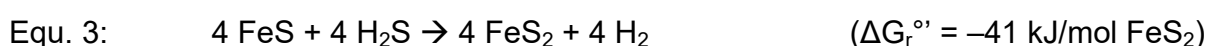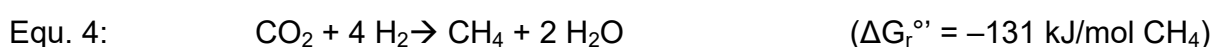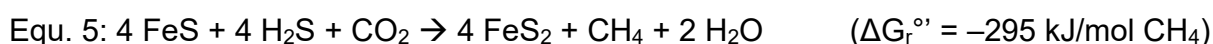

Indeed, the ratio of pyrite to methane formed in culture J5 was 4.1:1 and 3.2:1 in two independent experiments at 28°C (Table S2), respectively, thus confirming the proposed overall reaction stoichiometry.

## Exergonic pyrite formation supports microbial growth

Culture J5 was transferred more than 20 times on medium containing FeS, H<sub>2</sub>S and CO<sub>2</sub> as sole substrates. This indicates a strict dependence on syntrophic pyrite formation as the only energy-yielding reaction observed. Within incubation periods of 83–248 days, cell densities increased by more than one order of magnitude, from  $2 \times 10^5 \text{ cells mL}^{-1}$  to  $2\text{--}9 \times 10^6 \text{ cells mL}^{-1}$  (Fig. S3). Cells were typically found to be attached to mineral surfaces (Fig. 4C); however,

## Microbial pyrite formation

there was no indication of cell encrustation (Fig. 4D). Assuming an average cell volume of about  $1 \mu\text{m}^3$  and a dry mass content of 33% (28), our measured cell densities correspond to a maximum of ca. 3 mg dry cell mass  $\text{L}^{-1}$ . If formation of ATP requires 60–70  $\text{kJ mol}^{-1}$  (29) and if – under ideal growth conditions – 10.5 g biomass (dry weight) can be synthesized at the expense of 1 mol ATP (30), a complete conversion of 5 mM FeS + 5 mM  $\text{H}_2\text{S}$  according to equ. 5 could yield 4–5 mM ATP or ca. 50 mg dry cell mass  $\text{L}^{-1}$ . Of course, the conditions of lithoautotrophic growth in our enrichment cultures are entirely different from those used in the growth experiment by Bauchop and Elsdén, with heterotrophic growth in an organically rich medium. Moreover, formation of pyrite from FeS is an extremely slow process catalyzed at or close to mineral surfaces with very slow substrate turnover, which implies that major amounts of metabolic energy have to be invested in cell maintenance without concomitant growth (31). Thus, it is not surprising that our cell yields are lower than estimated above. If every partial reaction in equ. 5 (5 in total; 4 × FeS transformation, 1 ×  $\text{CH}_4$  formation) uses about 20 kJ for synthesis of a minimum of 1/3 of an ATP equivalent (29), the total process could synthesize 5/3 mmol ATP equivalents per liter. Considering that in culture J5 a maximum of 62.5% FeS conversion to  $\text{FeS}_2$  was observed (Table S2), the expected cell yield would – optimally – be 12 mg cell dry matter  $\text{L}^{-1}$ , which is close to the measured cell yield.

The community composition of culture J5 was analyzed by 16S rRNA gene clone libraries. All 16S rRNA gene sequences derived from amplification with a universal archaeal primer set belonged to the same species-level operational taxonomic unit (OTU, 99% sequence identity) and showed 97.6% sequence identity to *Methanospirillum stamsii* (Fig. 4B), a hydrogenotrophic methanogen isolated from a low-temperature bioreactor (32). Methanogenesis in culture J5 is likely performed by this OTU. Using a universal bacterial

## Microbial pyrite formation

primer set, we detected five bacterial OTUs (Fig. 4A). The majority of clones (76%) belonged to OTU 3, which showed 99.9% sequence identity with *Desulfomicrobium baculatum*, a sulfate reducer within the class Deltaproteobacteria (33, 34). Further OTUs related to Deltaproteobacteria were OTU 2 (12% rel. abundance) and OTU1 (6% rel. abundance). OTU 2 was closely related to *Desulfovibrio sulfodismutans* (97.9% sequence identity), which is capable of dismutating thiosulfate or sulfite (35), while OTU 1 was distantly related (96.2% sequence identity) to *Smithella propionica*, which is known to degrade propionate in syntrophy with methanogens (36). The remaining two bacterial OTUs were either distantly related (<91% sequence identity) to cultured members of the Firmicutes (OTU 4, 3% rel. abundance) or Actinobacteria (OTU 5, 3% rel. abundance). Interestingly, all OTUs belonging to the Deltaproteobacteria and Firmicutes fell into larger clusters that include cultured representatives with a sulfur-related energy metabolism. Therefore, it is tempting to speculate that enzymes operating in the respective sulfur transformation pathways might be involved in the microbial conversion of FeS to FeS<sub>2</sub>.

## Conclusion

Pyrite is produced in massive quantities in today's sediments (2). However, its formation in nature is far from understood, especially because its nucleation is kinetically hindered (1). The presence of sulfide-producing microorganisms as passive pyrite nucleation sites indicated support for abiotic pyrite formation (13-15), but could not be reproduced in every bacterial model system (6). We show that pyrite formation can be mediated by microorganisms to overcome the kinetic hurdle of nucleation, but as an essential part of their energy metabolism and not just as a mere abiotic side reaction on their cell surface. This may help to explain the ambiguous results published so far on the role of microorganisms in this process. Since we

## Microbial pyrite formation

found only one archaeal species closely related to methanogens in our enrichments, it is likely that one or several of the bacterial partners actually catalyze FeS transformation to pyrite. An exciting question currently remaining is whether these bacteria utilize internally the H<sub>2</sub>S pathway (equ. 2) or a combination of sulfide oxidation to zero-valent sulfur coupled to the polysulfide pathway (equ. 1) to finally produce pyrite (Fig. S4).

Our results further showed that the reducing equivalents released from FeS transformation to pyrite can be transferred to methanogenesis. This opens an interesting perspective on the metabolic versatility sustaining the vast deep biosphere inhabiting the Earth's subsurface (37). While recalcitrant organic matter or H<sub>2</sub> released by radiolytic cleavage of water (38, 39) have been proposed to sustain the enigmatic life forms of the deep biosphere, there is also experimental evidence of a cryptic sulfur cycle within deep sediments that would include pyrite formation coupled to methanogenesis to be functional (17). Our results show that this missing link could indeed be mediated by microorganisms and supply energy to support microbial growth. Since the redox potential ( $E_h^{\circ'}$ ) of the FeS/FeS<sub>2</sub> couple is -620 mV at circumneutral pH (40), it is well suited to provide reducing equivalents also for CO<sub>2</sub> fixation to acetate ( $E_h^{\circ'} = -290$  mV) and more complex organic matter in the pyrite-forming microorganism. Wächtershäuser proposed in his "iron-sulfur world" theory that exactly this mechanism was the basis for an autocatalytic metabolism and the resulting evolution of life at hydrothermal vents on primordial Earth (e.g. 20, 41). Our enrichment cultures may serve as a model to understand the enzymatic background of this hypothesis.

## Microbial pyrite formation

### 251 Methods

### 252 Cultivation

253 Enrichment cultures were initiated and maintained in carbonate-buffered, sulfide-reduced  
 254 (1 mM) freshwater mineral medium (42) supplemented with selenite-tungstate solution (43), 7-  
 255 vitamin solution (42), and trace element solution SL10 (44). The medium was prepared and  
 256 stored under a N<sub>2</sub>/CO<sub>2</sub> atmosphere (80:20). The final pH was adjusted to 7.2 to 7.4. From a  
 257 CO<sub>2</sub>-neutralized sulfide stock solution (45), 350 μmol H<sub>2</sub>S was added to 70 mL mineral  
 258 medium in 180 mL serum bottles that were sealed with butyl rubber stoppers. Since 1 mM H<sub>2</sub>S  
 259 was already present as reducing agent in the mineral medium, the final amount of H<sub>2</sub>S was  
 260 420 μmol. FeS was prepared from anoxic solutions of 0.4 M FeCl<sub>2</sub> and 0.4 M Na<sub>2</sub>S. The  
 261 resulting FeS precipitate was washed at least once and re-suspended in oxygen-free distilled  
 262 water. For Mössbauer spectroscopy analysis, FeS was prepared from a FeCl<sub>2</sub> solution that  
 263 contained 10% <sup>57</sup>FeCl<sub>2</sub> to enhance signal quality. 350 μmol FeS was added to 70 mL mineral  
 264 medium. Enrichment cultures were incubated in the dark at 28°C if not indicated otherwise. For  
 265 inhibition experiments, cultures were supplemented with either penicillin-G (1,000 U mL<sup>-1</sup>) or 2-  
 266 bromoethanesulfonate (10 mM). Abiotic controls were run without inoculum.

### 267 Monitoring of substrate turnover

268 For total dissolved sulfide measurements [ $\Sigma(\text{H}_2\text{S}_{\text{aq}}, \text{HS}^-, \text{S}^{2-})$ ], 100-μL samples were taken  
 269 from liquid cultures without disturbing the precipitated iron sulfide minerals, and directly  
 270 transferred to 100 μL of an anoxic 0.2 M NaOH solution. From the alkalized sample, 10–  
 271 20 μL were fixed in 100 μL of a 0.1 M zinc acetate solution, and sulfide was quantified by the  
 272 methylene blue method (46). The corresponding amount of H<sub>2</sub>S in the headspace was  
 273 calculated using Henry's law and a temperature-adjusted k-value of 0.093 (28°C, 47). CH<sub>4</sub> was

## Microbial pyrite formation

measured by gas chromatography with a flame ionization detector (SRI Instrument SGI 8610C) using a consecutive arrangement of a Porapak (80/100 mesh; 1 m × 2 mm) and a Hayesep-D packed column (80/100 mesh; 3 m × 2 mm). The injector and column temperatures were 60°C, and the detector temperature was 135°C. The carrier gas was N<sub>2</sub> at a flow rate of 3.2 ml min<sup>-1</sup>. Chromatograms were recorded with the PeakSimple v4.44 chromatography software.

Iron-sulfide minerals were analyzed by <sup>57</sup>Fe Mössbauer spectroscopy. Within an anoxic glovebox (100% N<sub>2</sub>), the enrichment culture was passed through a 0.44-μm filter and then sealed between two pieces of air-tight Kapton tape. Samples were transferred to a Mössbauer spectrometer (WissEl, Starnberg) within an airtight bottle filled with 100% N<sub>2</sub> that was only opened immediately prior to loading the samples inside the closed-cycle exchange gas cryostat (Janis cryogenics). Measurements were collected at a temperature of 5 K with a constant acceleration drive system (WissEL) in transmission mode with a <sup>57</sup>Co/Rh source and calibrated against a 7 μm thick α-<sup>57</sup>Fe foil measured at room temperature. All spectra were analyzed using Recoil (University of Ottawa) by applying the Voight Based Fitting (VBF) routine (48). The half width at half maximum (HWHM) was fixed to a value of 0.138 mm s<sup>-1</sup> for all samples.

X-ray diffraction (XRD) patterns were recorded with the D8 Discover system (Bruker) with IμS radiation source (2 mm in diameter), and a Lynxexe XE detector. Samples were dried for 2 h under a continuous stream of 100% N<sub>2</sub> and measured within 48 h under air as described previously (49). Measurements were done using CuKα rays in angles ranging from 10–70° 2θ in 0.02° steps with 2,880 sec measuring time and a total measuring time of 12 h and 47 min. The resulting spectra were compared with spectra provided in the international crystal structure

## Microbial pyrite formation

296 database (ICSD), FIZ Karlsruhe (version 2016/2) using the software DIFFRAC.EVA (version  
297 4.1.1, Bruker).

### 298 Scanning electron microscopy coupled to energy dispersive x-ray spectroscopy (SEM-EDX)

299 For SEM-EDX analysis, 1 mL of culture was centrifuged at 4,500  $\times g$  for 10 min. 200  $\mu$ L of the  
300 resulting pellet was transferred on gelatin-coated glass slides. Samples were fixed in 1 mL  
301 2.5% glutaraldehyde in 0.1 M HEPES-buffer containing 0.01 M KCl (HEPES-KCl) and in 2%  
302 OsO<sub>4</sub> in HEPES-KCl for 60 min each. Fixed samples were dehydrated in a graded ethanol  
303 series (30%, 50%, 70%, 80%, 90%, 96% and absolute ethanol) for 30 min each. Thereafter,  
304 samples were critical-point dried under CO<sub>2</sub> in a Bal-Tec CPD030 (Balzers). Sputter coating of  
305 6 nm platinum was done in a Quorum Q150R ES sputter coater (Quorum Technologies) and  
306 micrographs were taken with a FESEM Auriga 40 (Zeiss). EDX mappings and point  
307 measurements were taken at a working distance of 5 mm with an Oxford X-Max detector  
308 (Oxford Instruments) and at 10 kV and 15 kV, respectively. Point measurements were  
309 normalized to 10,000 counts within a K $\alpha$  energy of 6.3–6.5 keV. Sample preparation for cell  
310 counts by fluorescent microscopy is described in detail in the Supporting Information.

### 311 Phylogenetic analysis

312 Total genomic DNA was extracted from 50 mL of a 4.5-months old culture using a phenol-  
313 based beat-beating protocol modified after Loy, Beisker and Meier (50). Subsequent  
314 amplification of bacterial or archaeal 16S rRNA genes was done using standard PCR protocols  
315 based on universal primers. Details are given in the Supporting Information. 16S rRNA gene  
316 clone libraries were constructed using the TOPO® TA Cloning® Kit (ThermoFisher Scientific).  
317 Bacterial or archaeal 16S rRNA gene fragments were aligned by use of the SINA webaligner  
318 (51) to the non-redundant 16S rRNA gene database v.123.1 available on the SILVA online

## Microbial pyrite formation

platform (52, [www.arb-silva.de](http://www.arb-silva.de)) and imported into ARB for initial phylogenetic analysis (53). OTU clustering was performed in mothur v.1.22.2 (54) using the furthest neighbor approach and a 99%-identity cutoff to delineate OTUs at the approximate species level (55). For phylogenetic inference of 16S rRNA gene fragments representing individual OTUs, Maximum Likelihood (ML) trees were calculated using RAxML v8.2.9 (56) as implemented on the CIPRES webserver (57, [www.phylo.org](http://www.phylo.org)). Using a 50% conservation filter of nucleic acid positions within the domain Bacteria, a RAxML tree was inferred from 1,102 unambiguously aligned nucleic acid positions for bacterial 16S rRNA genes. The reconstruction of the archaeal tree followed the same outline but using 752 unambiguously aligned nucleic acid positions and no conservation filter because of the close relatedness of all included sequences. Calculations were based on the GTRGAMMA distribution model of substitution rate heterogeneity. MRE-based bootstrap analysis stopped after 204 and 102 replicates for the bacterial and archaeal 16S rRNA gene tree, respectively. Sequences are available from NCBI GenBank under accession numbers MH665848–MH665880 and MH665881–MH665889 for Bacteria and Archaea, respectively.

## Acknowledgements

This study was financed by the Konstanz Research School Chemical Biology (KoRs-CB). We are grateful to Waltraud Dilling for maintaining initial pyrite-forming enrichments and to Ben Griffin for his initial work on the latter. We further thank Michael Laumann for his engagement with SEM-EDX, Stephan Siroky and the Particle Analysis Center for the XRD analysis, as well as the Bioimaging Center (University of Konstanz).



# Microbial pyrite formation

## Figures

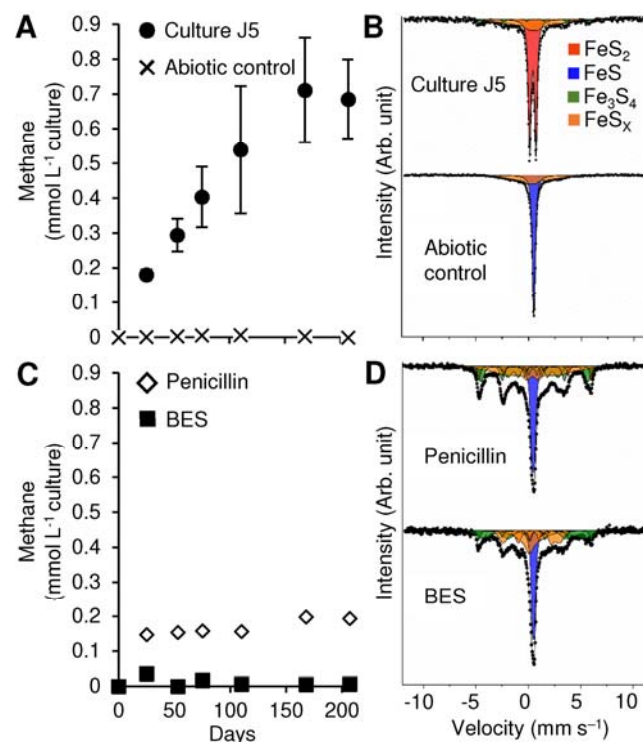

Figure 1. Time-resolved CH<sub>4</sub> formation in comparison to iron-sulfur mineral composition after nearly seven months of incubation (207 days) in culture J5 as compared to abiotic controls and incubations of culture J5 with penicillin-G (1,000 U ml<sup>-1</sup>) or 2-bromoethanesulfonate (BES, 10 mM). (A) and (C) show the mean  $\pm$  one standard deviation of CH<sub>4</sub> measurements of three independent incubations. Standard deviations are often smaller than the actual symbol size. (B) and (D) show Mössbauer spectra corresponding to the last time point in the presented time series with FeS<sub>2</sub> in red, FeS in blue, Fe<sub>3</sub>S<sub>4</sub> in green, and intermediate FeS<sub>x</sub> phases in orange.

# Microbial pyrite formation

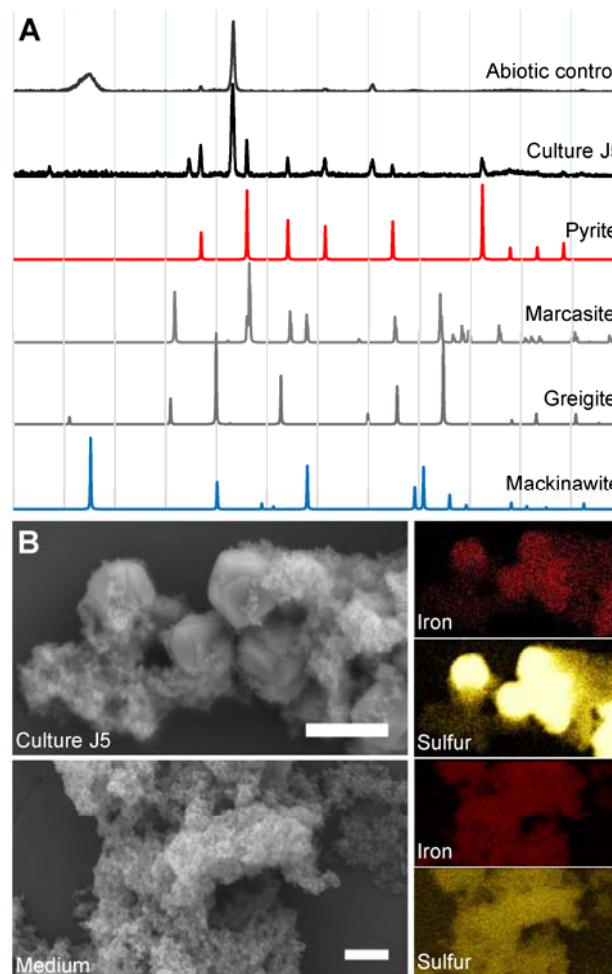

Figure 2. (A) Representative X-ray diffractograms of mineral precipitates formed in culture J5 and an abiotic control setup after 9 months of incubation (281 days). Diffraction data of the two FeS<sub>2</sub> dimorphs pyrite and marcasite as well as of Fe<sub>3</sub>S<sub>4</sub> (greigite) and FeS (mackinawite) are given as reference. (B) Scanning electron microscopy images of a nearly 7-months old (211 days) culture J5 in comparison to freshly prepared medium without inoculum. The scale bar represents 2 μm. Images to the right show the corresponding results from energy dispersive X-ray spectroscopy (EDX). Besides atoms from medium salts, iron and sulfur were the only elements discovered in the mineral phases.

# Microbial pyrite formation

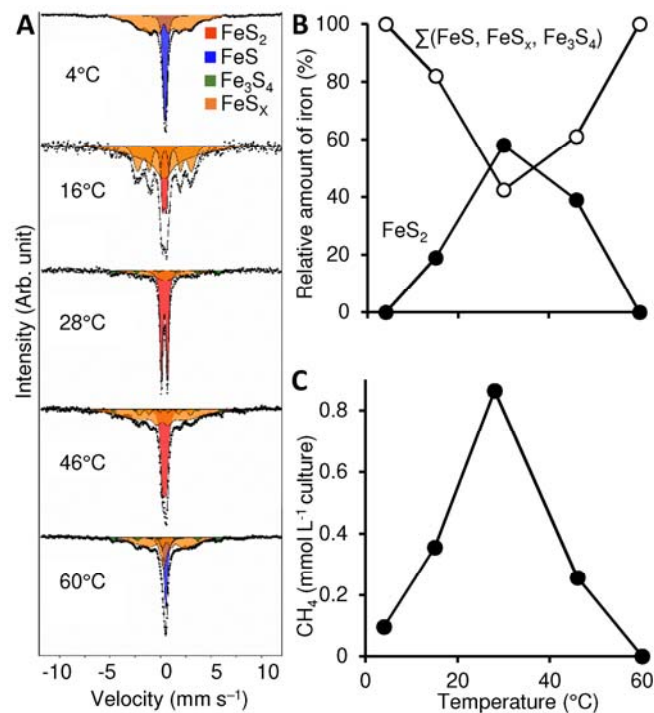

Figure 3. Temperature-dependent pyrite and methane formation in culture J5 after nearly 7 months of incubation (207 days). A) Mössbauer spectra showing the temperature-dependent iron-sulfur mineral composition (FeS<sub>2</sub> in red, FeS in blue, Fe<sub>3</sub>S<sub>4</sub> in green, and intermediate FeS<sub>x</sub> phases in orange). B) Relative abundance of pyrite (FeS<sub>2</sub>) in comparison to all other measured iron-sulfur minerals plotted against temperature as the explanatory variable. Details are provided in Table S2. C) Average amount of methane (n=2) plotted against temperature as the explanatory variable.

# Microbial pyrite formation

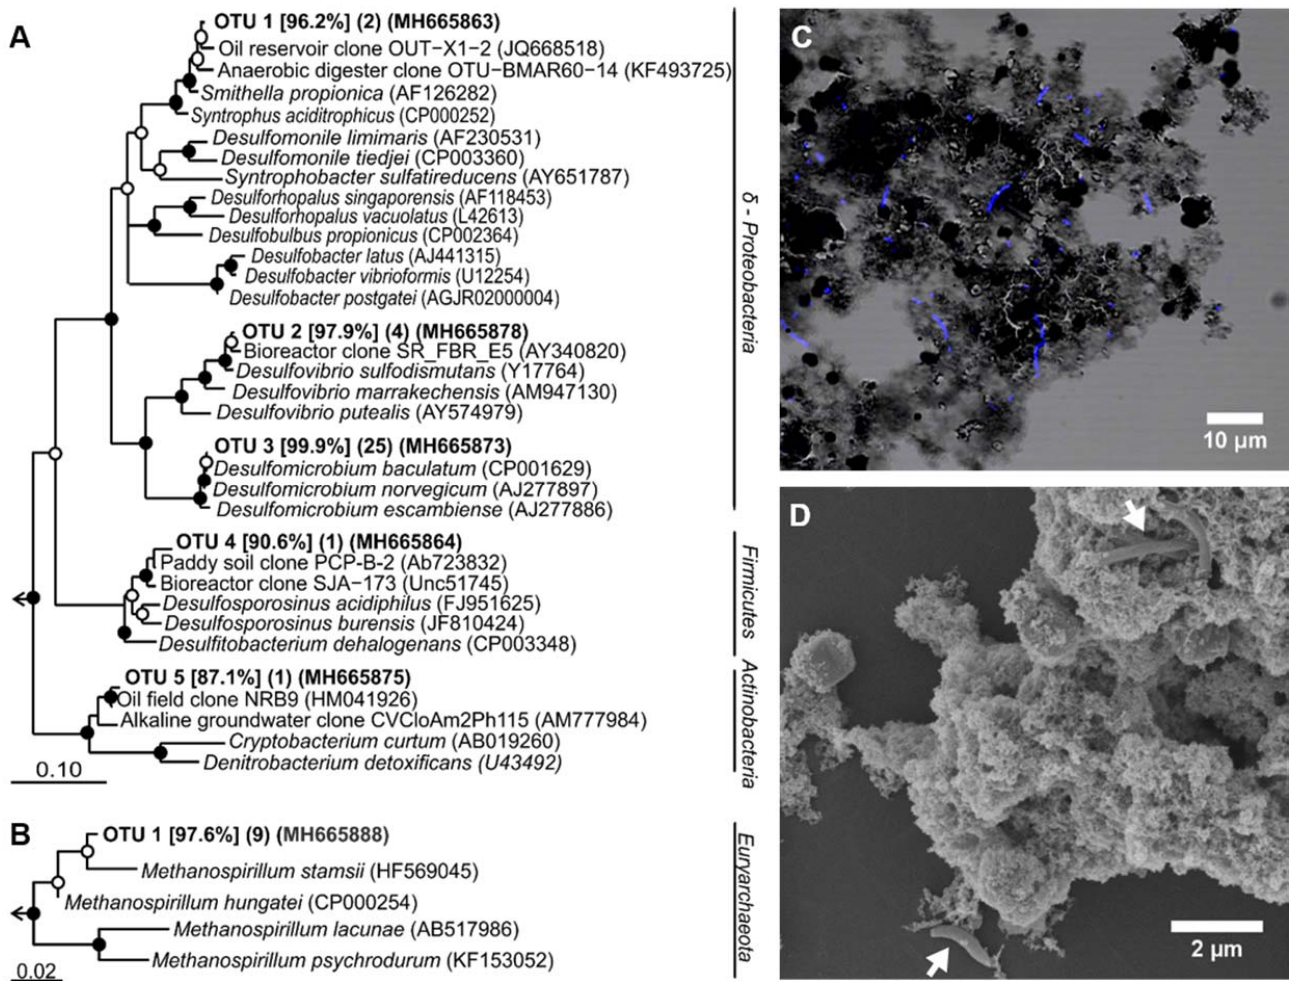

Figure 4. Bacterial and archaeal community composition of enrichment culture J5. RAxML trees based on bacterial (A) and archaeal (B) 16S rRNA gene sequences obtained from culture J5. Representative sequences of OTUs at the approximate species level (99% sequence identity) are shown. Sequence identity to the next cultured relative is given in percent in square brackets. Numbers of clones from the same OTU are presented in parenthesis followed by the GenBank accession number of a representative sequence. Bootstrap support is indicated by closed ( $\geq 90\%$ ) and open ( $\geq 70\%$ ) circles at the respective branching points. The scale bar represents 10% (Bacteria) and 2% (Archaea) estimated sequence divergence. (C) Combined phase contrast image and fluorescent image of DAPI-stained cells and (D) scanning electron

## Microbial pyrite formation

376 microscopy image with cells indicated by white arrows of culture J5 after 7.4 and 10 months of  
377 incubation, respectively.

378

## Microbial pyrite formation

## References

1. Rickard D, Luther GW (2007) Chemistry of iron sulfides. *Chem Rev* 107(2):514-562.
2. Canfield DE, Farquhar J (2012) The global sulfur cycle. *Fundamentals of Geobiology*, eds Knoll H, Canfield DE, & Konhauser KO (John Wiley & Sons, Oxford), pp 49-64.
3. Rickard D, Luther GW (1997) Kinetics of pyrite formation by the H<sub>2</sub>S oxidation of iron(II) monosulfide in aqueous solutions between 25 and 125°C: The mechanism. *Geochim Cosmochim Acta* 61(1):135-147.
4. Rickard D, Butler IB, Oldroyd A (2001) A novel iron sulphide mineral switch and its implications for Earth and planetary science. *Earth Planet Sc Lett* 189(1-2):85-91.
5. Berner RA (1970) Sedimentary pyrite formation. *Am J Sci* 268(1):1-23.
6. Picard A, Gartman A, Clarke DR, Girguis PR (2018) Sulfate-reducing bacteria influence the nucleation and growth of mackinawite and greigite. *Geochim Cosmochim Acta* 220:367-384.
7. Wilkin RT, Barnes HL (1996) Pyrite formation by reactions of iron monosulfides with dissolved inorganic and organic sulfur species. *Geochim Cosmochim Acta* 60(21):4167-4179.
8. Schoonen MAA, Barnes HL (1991) Reactions forming pyrite and marcasite from solution .1. Nucleation of FeS<sub>2</sub> below 100°C. *Geochim Cosmochim Acta* 55(6):1495-1504.
9. Rickard D (1969) The microbiological formation of iron sulphides. *Stockholm Contributions to Geology* 20:49-66.
10. Benning LG, Wilkin RT, Barnes HL (2000) Reaction pathways in the Fe-S system below 100°C. *Chem Geol* 167(1-2):25-51.
11. Benning L, Barnes H (1998) In situ determination of the stability of iron monosulphides and kinetics of pyrite formation. *Mineral Mag A* 62:151-152.
12. Berner RA (1984) Sedimentary pyrite formation - an update. *Geochim Cosmochim Acta* 48(4):605-615.
13. Finster K, Liesack W, Thamdrup B (1998) Elemental sulfur and thiosulfate disproportionation by *Desulfocapsa sulfoexigens* sp. nov., a new anaerobic bacterium isolated from marine surface sediment. *Appl Environ Microbiol* 64(1):119-125.
14. Canfield DE, Thamdrup B, Fleischer S (1998) Isotope fractionation and sulfur metabolism by pure and enrichment cultures of elemental sulfur-disproportionating Bacteria. *Limnol Oceanogr* 43(2):253-264.
15. Thamdrup B, Finster K, Hansen JW, Bak F (1993) Bacterial disproportionation of elemental sulfur coupled to chemical-reduction of iron or manganese. *Appl Environ Microbiol* 59(1):101-108.
16. Donald R, Southam G (1999) Low temperature anaerobic bacterial diagenesis of ferrous monosulfide to pyrite. *Geochim Cosmochim Acta* 63(13-14):2019-2023.



# Microbial pyrite formation

17. Holmkvist L, Ferdelman TG, Jørgensen BB (2011) A cryptic sulfur cycle driven by iron in the methane zone of marine sediment (Aarhus Bay, Denmark). *Geochim Cosmochim Acta* 75(12):3581-3599.
18. Wächtershäuser G (1988) Before enzymes and templates: theory of surface metabolism. *Microbiol Rev* 52(4):452-484.
19. Wächtershäuser G (2007) On the chemistry and evolution of the pioneer organism. *Chem Biodivers* 4(4):584-602.
20. Martin W, Russell MJ (2003) On the origins of cells: a hypothesis for the evolutionary transitions from abiotic geochemistry to chemoautotrophic prokaryotes, and from prokaryotes to nucleated cells. *Philos Trans R Soc Lond B Biol Sci* 358(1429):59-83.
21. Wan M, Schroder C, Peiffer S (2017) Fe(III): S(-II) concentration ratio controls the pathway and the kinetics of pyrite formation during sulfidation of ferric hydroxides. *Geochim Cosmochim Acta* 217:334-348.
22. Vandenberghe RE, de Grave E, de Bakker PMA, Krs M, Hus JJ (1992) Mössbauer effect study of natural greigite. *Hyperfine Interact* 68(1):319-322.
23. Hunger S, Benning LG (2007) Greigite: a true intermediate on the polysulfide pathway to pyrite. *Geochem T* 8:1. <https://doi.org/10.1186/1467-4866-1188-1181>.
24. Bourdoiseau JA, Jeannin M, Remazeilles C, Sabota R, Refait P (2011) The transformation of mackinawite into greigite studied by Raman spectroscopy. *J Raman Spectrosc* 42(3):496-504.
25. Oremland RS, Capone DG (1988) Use of specific inhibitors in biogeochemistry and microbial ecology. *Adv Microb Ecol* 10:285-383.
26. Schink B, Stams AJM (2006) Syntrophism among prokaryotes. *The Prokaryotes*, ed Dworkin M, Falkow, S., Rosenberg, E., Schleifer, K.-H., Stackebrandt, E. (Springer, Singapore), Third Ed Vol 2, pp 309-335.
27. Drobner E, Huber H, Wächtershäuser G, Rose D, Stetter KO (1990) Pyrite formation linked with hydrogen evolution under anaerobic conditions. *Nature* 346(6286):742-744.
28. Bratbak G, Dundas I (1984) Bacterial dry-matter content and biomass estimations. *Appl Environ Microbiol* 48(4):755-757.
29. Schink B (1997) Energetics of syntrophic cooperation in methanogenic degradation. *Microbiol Mol Biol Rev* 61(2):262-280.
30. Bauchop T, Elsden SR (1960) The growth of micro-organisms in relation to their energy supply. *J Gen Microbiol* 23(3):457-469.
31. Pirt SJ (1982) Maintenance energy - a general-model for energy-limited and energy-sufficient growth. *Arch Microbiol* 133(4):300-302.

# Microbial pyrite formation

32. Parshina SN, Ermakova AV, Bomberg M, Detkova EN (2014) *Methanospirillum stamsii* sp. nov., a psychrotolerant, hydrogenotrophic, methanogenic archaeon isolated from an anaerobic expanded granular sludge bed bioreactor operated at low temperature. *Int J Syst Evol Microbiol* 64(1):180-186.
33. Rozanova EP, Nazina TN (1976) A mesophilic, sulfate-reducing, rod-shaped, non-spore-forming bacterium. *Microbiologiya (USSR)* 45(5):825-830.
34. Rozanova EP, Nazina TN, Galushko AS (1988) Isolation of a new genus of sulfate-reducing bacteria and description of a new species of this genus, *Desulfomicrobium apsheronum* gen. nov., sp. nov. *Microbiologiya (USSR)* 57(4):634-641.
35. Bak F, Pfennig N (1987) Chemolithotrophic growth of *Desulfovibrio sulfodismutans* sp. nov. by disproportionation of inorganic sulfur-compounds. *Arch Microbiol* 147(2):184-189.
36. Liu YT, Balkwill DL, Aldrich HC, Drake GR, Boone DR (1999) Characterization of the anaerobic propionate-degrading syntrophs *Smithella propionica* gen. nov., sp. nov. and *Syntrophobacter wolinii*. *Int J Syst Bacteriol* 49:545-556.
37. Jørgensen BB, Marshall IPG (2016) Slow microbial life in the seabed. *Annu Rev Mar Sci* 8:311-332.
38. Jørgensen BB, D'Hondt S (2006) A starving majority deep beneath the seafloor. *Science* 314(5801):932-934.
39. Lin L-H, Slater G, Lollar B, Lacrampe-Couloume G, Onstott TC (2005) The yield and isotopic composition of radiolytic H<sub>2</sub>, a potential energy source for the deep subsurface biosphere. *Geochim Cosmochim Acta* 69(4):893-903.
40. Kaschke M, Russell MJ, Cole WJ (1994) [Fes/Fes(2)] - a redox system for the origin of life. *Origins Life Evol B* 24(1):43-56.
41. Wächtershäuser G (2006) From volcanic origins of chemoautotrophic life to Bacteria, Archaea and Eukarya. *Philos Trans R Soc Lond B Biol Sci* 361(1474):1787-1806.
42. Widdel F, Pfennig N (1981) Studies on dissimilatory sulfate-reducing bacteria that decompose fatty acids. I. Isolation of new sulfate-reducing bacteria enriched with acetate from saline environments. Description of *Desulfobacter postgatei* gen. nov., sp. nov. *Arch Microbiol* 129(5):395-400.
43. Tschech A, Pfennig N (1984) Growth-yield increase linked to caffeate reduction in *Acetobacterium woodii*. *Arch Microbiol* 137(2):163-167.
44. Widdel F, Kohring GW, Mayer F (1983) Studies on dissimilatory sulfate-reducing bacteria that decompose fatty-acids .3. Characterization of the filamentous gliding *Desulfonema limicola* gen. nov sp. nov, and *Desulfonema magnum* sp. nov. *Arch Microbiol* 134(4):286-294.
45. Siefert E, Pfennig N (1984) Convenient method to prepare neutral sulfide solution for cultivation of phototrophic sulfur bacteria. *Arch Microbiol* 139(1):100-101.
46. Cline JD (1969) Spectrophotometric determination of hydrogen sulfide in natural waters. *Limnol Oceanogr* 14(3):454-458.



# Microbial pyrite formation

- 477 47. Carroll JJ, Mather AE (1989) The solubility of hydrogen-sulfide in water from 0°C to 90°C and pressures  
478 to 1 MPa. *Geochim Cosmochim Acta* 53(6):1163-1170.
- 479 48. Rancourt DG, Ping JY (1991) Voigt-based methods for arbitrary-shape static hyperfine parameter  
480 distributions in mössbauer spectroscopy. *Nucl Instrum Meth B* 58(1):85-97.
- 481 49. Taylor P, Rummery TE, Owen DG (1979) Reactions of iron monosulfide solids with aqueous hydrogen-  
482 sulfide up to 160°C. *J Inorg Nucl Chem* 41(12):1683-1687.
- 483 50. Loy A, Beisker W, Meier H (2005) Diversity of bacteria growing in natural mineral water after bottling.  
484 *Appl Environ Microbiol* 71(7):3624-3632.
- 485 51. Pruesse E, *et al.* (2007) SILVA: a comprehensive online resource for quality checked and aligned  
486 ribosomal RNA sequence data compatible with ARB. *Nucleic Acids Res* 35(21):7188-7196.
- 487 52. Quast C, *et al.* (2013) The SILVA ribosomal RNA gene database project: improved data processing and  
488 web-based tools. *Nucleic Acids Res* 41(D1):D590-D596.
- 489 53. Ludwig W, *et al.* (2004) ARB: a software environment for sequence data. *Nucleic Acids Res* 32(4):1363-  
490 1371.
- 491 54. Schloss PD, *et al.* (2009) Introducing mothur: open-source, platform-independent, community-  
492 supported software for describing and comparing microbial communities. *Appl Environ Microbiol*  
493 75(23):7537-7541.
- 494 55. Stackebrandt E, Ebers J (2006) Taxonomic parameters revisited: tarnished gold standards. *Microbiology*  
495 *Today* 33(4):152–154.
- 496 56. Stamatakis A (2014) RAxML version 8: a tool for phylogenetic analysis and post-analysis of large  
497 phylogenies. *Bioinformatics* 30(9):1312-1313.
- 498 57. Miller MA, Pfeiffer W, Schwartz T (2010) Creating the CIPRES Science Gateway for inference of large  
499 phylogenetic trees. *2010 Gateway Computing Environments Workshop (GCE)*, pp 1-8.
- 500 58. Berthold MR, *et al.* (2008) KNIME: The Konstanz Information Miner. (Springer), pp 319-326.
- 501 59. Loy A, *et al.* (2002) Oligonucleotide microarray for 16S rRNA gene-based detection of all recognized  
502 lineages of sulfate-reducing prokaryotes in the environment. *Appl Environ Microbiol* 68(10):5064-5081.
- 503 60. Berry D, Ben Mahfoudh K, Wagner M, Loy A (2011) Barcoded primers used in multiplex amplicon  
504 pyrosequencing bias amplification. *Appl Environ Microbiol* 77(21):7846-7849.
- 505 61. Lueders T, Friedrich MW (2002) Effects of amendment with ferrihydrite and gypsum on the structure  
506 and activity of methanogenic populations in rice field soil. *Appl Environ Microbiol* 68(5):2484-2494.
- 507 62. Casamayor EO, *et al.* (2002) Changes in archaeal, bacterial and eukaryal assemblages along a salinity  
508 gradient by comparison of genetic fingerprinting methods in a multipond solar saltern. *Environ Microbiol*  
509 4(6):338-348.

## Microbial pyrite formation

### Supporting Information

### Supporting Materials and Methods

**Cell counts by fluorescence microscopy.** For cell counts, 0.5 mL culture was fixed overnight in 9.5 mL freshly prepared paraformaldehyde solution (4%), subsequently centrifuged at 10,000  $\times g$  for 10 min at 4°C and re-suspended in 1 mL PBS [130 mM NaCl, 5% (v/v) phosphate buffer (40 mM NaH<sub>2</sub>PO<sub>4</sub>, 160 mM Na<sub>2</sub>HPO<sub>4</sub>), pH 7.2] and 9 mL ammonium oxalate solution (5.6 g ammonium-oxalate and 4.2 g oxalic acid dihydrate in 200 mL distilled water). Samples were vortexed for 10 min to dissolve most of the iron sulfide minerals so that cells could be collected on a 0.2  $\mu m$  pore size filter (GTTP-white, Millipore). Filters were air-dried and stored at -20°C. Filter sections were stained with a 1  $\mu g mL^{-1}$  4',6-diamidino-2-phenylindole (DAPI) solution and incubated for 10 min in the dark. Thereafter, filters were washed for 5 min in distilled water, followed by two 1-min washing steps in 80% ethanol. Dry DAPI-stained filters were mounted on microscope slides using CitiFluor™ AF1. For fluorescence microscopy, an inverted microscope (AxioObserver, Zeiss) with a 40x/0.60 LD-PlanNeofluar objective was used. Z-stacks were acquired with a distance of 0.28  $\mu m$ . Image processing involved 3-dimensional deconvolution of each stack using a theoretical PSF with ZEN Black (Zeiss AG). Cells were counted using an image processing workflow set up in KNIME 3.4.0 (58) using orthogonal projections of the de-convoluted input stacks. The workflow is available at <https://github.com/bic-kn/cell-counting-workflow>.

**DNA extraction.** The DNA extraction protocol was adopted from (50). A 4.5-month old 50-mL culture was harvested after CH<sub>4</sub> concentrations reached a plateau of 2.1% in the headspace (corresponding to 55  $\mu mol$  produced CH<sub>4</sub>). Harvesting was done by 10 min of centrifugation at 6,000  $\times g$ . The pellet was re-suspended in 400  $\mu L$  autoclaved TE-Buffer (10 mM Tris & 1 mM

## Microbial pyrite formation

EDTA in MQ water, pH 8) and stored for three hours at  $-20^{\circ}\text{C}$ . Cells were thawed on ice, mixed with heat-sterilized zirconium beads (0.1 mm), 600  $\mu\text{L}$  phenol/chloroform/isoamylalcohol (25:24:1, Carl Roth), and 150  $\mu\text{L}$  of a 10% sterile-filtered SDS-solution in a screw-cap tube, and vigorously shaken for 20 min using a vortexer. After centrifugation for 20 min at  $20,817 \times g$  and  $4^{\circ}\text{C}$ , the aqueous supernatant was transferred to a new reaction tube. Because the aqueous phase was hardly visible due to remaining iron sulfide minerals, another 10-minute centrifugation step was used to remove residual phenol from the extract. DNA was precipitated by incubation at  $-20^{\circ}\text{C}$  overnight in 0.1 volume of 3 M Na-acetate (in MQ-water, autoclaved) and 2.5 volumes absolute ethanol. Afterwards, the pellet was washed twice with 70% ethanol, dried for 5 min, and re-suspended in 50  $\mu\text{L}$  DNase- and RNase- free  $\text{H}_2\text{O}$ . DNA concentrations were quantified fluorimetrically using Quant-iT PicoGreen (Invitrogen).

**16S rRNA gene clone library.** Amplification of bacterial 16S rRNA genes was performed with Bact8f (5'-AGA GTT TGA TYM TGG CTC-3') as forward primer (59) and 1492r (5'-N TAC CTT GTT ACG ACT-3') as reverse primer (60). Archaeal species were targeted by AR109F (5'-ACK GCT CAG TAA CAC GT-3') as forward (61) and AR915 (3'-GTG CTC CCC CGC CAA TTC CT-3') as reverse primer (62). The PCR mixture contained 0.2 mM of each dNTP, 2 mM  $\text{MgCl}_2$ , 20  $\mu\text{g}$  BSA, 1 U of *Taq* DNA polymerase, and a *Taq* polymerase buffer with KCl (ThermoFisher Scientific). The PCR was performed using an initial denaturation at  $95^{\circ}\text{C}$  for 5 min; 30 cycles of  $95^{\circ}\text{C}$  for 30 s,  $50^{\circ}\text{C}$  for 30 s,  $72^{\circ}\text{C}$  for 1.5 min; and a final elongation at  $72^{\circ}\text{C}$  for 7 min. For PCRs with archaeal primers, the annealing temperature was set to  $55^{\circ}\text{C}$ . Amplification products were purified by use of the Zymo Research DNA Clean & Concentrator Kit (Zymo Research). 16S rRNA clone libraries were obtained with the TOPO® TA Cloning® Kit (ThermoFisher Scientific). Clones were screened by M13-PCR for inserts of the correct size

## Microbial pyrite formation

556 according to the manufacturer's instructions. Resulting PCR products of expected length were  
557 purified by use of the Zymo Research DNA Clean & Concentrator Kit and sent for sequencing.

## Microbial pyrite formation

### Supporting Tables

Table S1. Overview of inocula used to establish initial pyrite-forming enrichment cultures.

| Enrichment | Date       | Sampling area                                       | Material               | Medium†    | Temp. (°C) | pH  |
|------------|------------|-----------------------------------------------------|------------------------|------------|------------|-----|
| J5*        | Sept. 1995 | Sewage treatment plant<br>Konstanz, Germany         | digested sewage sludge | freshwater | 28         | 7.2 |
| J2*        | Sept. 1995 | Sewage treatment plant<br>Konstanz, Germany         | digested sewage sludge | freshwater | 16         | 7.2 |
| J7         | Apr. 1993  | Rio Tentor (Venice, Italy)                          | brackish sediment      | marine     | 16         | 7.2 |
| J8*        | Mar. 1991  | Wadden sea sediment,<br>Groningen, The Netherlands  | marine sediment        | marine     | 16         | 7.2 |
| J9*        | Apr. 1993  | Fish market channel<br>(Venice, Italy)              | brackish sediment      | marine     | 16         | 7.2 |
| X1         | Sept. 1995 | Sewage treatment plant<br>Tübingen-Lustnau, Germany | digested sewage sludge | freshwater | 28         | 7.2 |
| X2         | Sept. 1995 | Lake Constance, Güll                                | freshwater sediment    | freshwater | 28         | 7.2 |

† after Widdel and Pfennig (42)

\* CH<sub>4</sub> formation observed

# Microbial pyrite formation

Table S2. Iron mineral analysis by Mössbauer spectroscopy at a temperature of 5 K in nearly 7-month-old (207 days) culture J5 incubated at various temperatures and in the presence of various inhibitors. Mössbauer parameters were obtained through Voigt based fitting (VBF).  $\delta$  – isomer shift,  $\Delta E_Q$  – quadrupole splitting,  $\epsilon$  – quadrupole shift,  $B_{hf}$  – internal magnetic field, R.A. – relative area,  $X^2$  – goodness of fit parameter. The absolute amount of formed  $FeS_2$  was inferred from the relative area of the  $FeS_2$  signal and the maximum amount of 350  $\mu mol$  that could be produced if all FeS would have been converted to  $FeS_2$ .

| Sample                                 | Phase     | $\delta$<br>(mm/s) | $\Delta E_Q$<br>(mm/s) | $\epsilon$<br>(mm/s) | $B_{hf}$<br>(T) | R. A.<br>% | $X^2$ | $FeS_2$<br>( $\mu mol$ ) |
|----------------------------------------|-----------|--------------------|------------------------|----------------------|-----------------|------------|-------|--------------------------|
| Abiotic control                        | FeS       | 0.43               |                        | 0.15                 | 13.1            | 64.3       | 1.67  |                          |
|                                        | $FeS_x$   | 0.50               | 0.13                   |                      |                 | 35.7       |       |                          |
| 4 °C                                   | FeS       | 0.47               | 0.27                   |                      |                 | 37.8       | 6.01  |                          |
|                                        | $FeS_x$   | 0.43               |                        | 0.07                 | 17.2            | 62.2       |       |                          |
| 16 °C                                  | $FeS_2$   | 0.41               | 0.38                   |                      |                 | 18.5       | 0.78  | 64.8                     |
|                                        | $FeS_x$   | 0.39               |                        | 0.02                 | 19.2            | 48.8       |       |                          |
|                                        | $FeS_x$   | 0.42               |                        | -0.02                | 16.5            | 32.7       |       |                          |
| 28 °C<br>Replicate I                   | $FeS_2$   | 0.41               | 0.50                   |                      |                 | 52.8       | 0.88  | 184.8†                   |
|                                        | $FeS_x$   | 0.32               |                        | 0.07                 | 15.7            | 38.9       |       |                          |
|                                        | $Fe_3S_4$ | 0.46               |                        | 0.05                 | 32.0            | 8.3        |       |                          |
| 28 °C<br>Replicate II                  | $FeS_2$   | 0.40               | 0.58                   |                      |                 | 62.5       | 0.78  | 218.8§                   |
|                                        | $FeS_x$   | 0.29               |                        | -0.2                 | 16.4            | 31.0       |       |                          |
|                                        | $Fe_3S_4$ | 0.60               |                        | -0.05                | 32.0            | 6.5        |       |                          |
| 46 °C                                  | $FeS_2$   | 0.42               | 0.41                   |                      |                 | 39.4       | 1.67  | 137.9                    |
|                                        | $FeS_x$   | 0.10               |                        | -0.09                | 21.1            | 50.5       |       |                          |
|                                        | $FeS_x$   | 0.40               |                        | 0.05                 | 15.7            | 7.8        |       |                          |
|                                        | $Fe_3S_4$ | 0.64               |                        | 0.03                 | 33.2            | 2.3        |       |                          |
| 60 °C                                  | FeS       | 0.54               | 0.16                   |                      |                 | 27.1       | 1.74  |                          |
|                                        | $FeS_x$   | 0.34               |                        | 0.05                 | 2.4             | 21.6       |       |                          |
|                                        | $FeS_x$   | 0.55               |                        | -0.08                | 16.6            | 43.9       |       |                          |
|                                        | $Fe_3S_4$ | 0.63               |                        | -0.08                | 31.9            | 7.3        |       |                          |
| Penicillin + 79% $H_2$<br>( headspace) | FeS       | 0.51               | 0.16                   |                      |                 | 31.6       | 1.12  |                          |
|                                        | $FeS_x$   | 0.38               |                        | 0.15                 | 5.3             | 17.4       |       |                          |
|                                        | $FeS_x$   | 0.85               |                        | 0.01                 | 23.0            | 37.5       |       |                          |
|                                        | $FeS_x$   | 0.46               |                        | -0.07                | 15.5            | 13.4       |       |                          |
| Penicillin                             | FeS       | 0.46               | 0.27                   |                      |                 | 26.4       | 1.15  |                          |
|                                        | $Fe_3S_4$ | 0.68               |                        | -0.04                | 33.1            | 8.8        |       |                          |
|                                        | $Fe_3S_4$ | 0.52               |                        | 0.05                 | 31.7            | 18.8       |       |                          |
|                                        | $FeS_x$   | 0.44               |                        | 0.00                 | 14.9            | 15.0       |       |                          |
|                                        | $FeS_x$   | 0.43               |                        | 0.02                 | 20.2            | 31.1       |       |                          |
| BES                                    | FeS       | 0.50               | 0.22                   |                      |                 | 28.1       | 0.76  |                          |
|                                        | $Fe_3S_4$ | 0.69               |                        | -0.15                | 29.6            | 23.4       |       |                          |
|                                        | $Fe_3S_4$ | 0.62               |                        | 0.02                 | 33.1            | 7.1        |       |                          |
|                                        | $FeS_x$   | 0.25               |                        | 0.15                 | 7.4             | 20.2       |       |                          |
|                                        | $FeS_x$   | 0.44               |                        | -0.16                | 16.6            | 21.2       |       |                          |

† corresponding amount of formed  $CH_4$ : 44.9  $\mu mol$

§ corresponding amount of formed  $CH_4$ : 67.6  $\mu mol$

# Microbial pyrite formation

## Supporting Figures

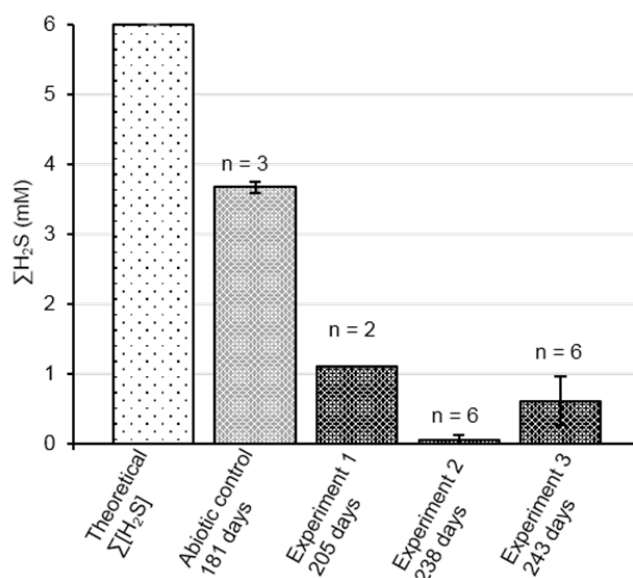

575

576 Figure S1. Total H<sub>2</sub>S as the sum of H<sub>2</sub>S<sub>gaseous</sub>, H<sub>2</sub>S<sub>aqueous</sub>, HS<sup>-</sup>, and S<sup>2-</sup> in the non-inoculated  
577 medium as compared to the abiotic control and enrichment culture J5 in various independent  
578 incubation experiments. The time of incubation is indicated in days. Biological replicates are  
579 indicated as n.

580

# Microbial pyrite formation

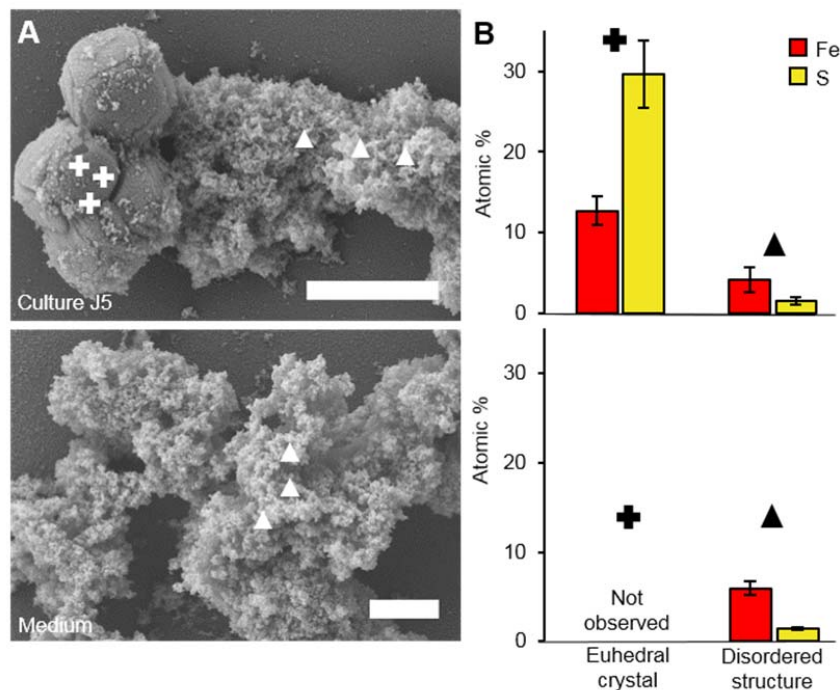

Figure S2. Fe:S ratio of different mineral phases in culture J5 and freshly prepared medium without inoculum. (A) Exemplary scanning electron microscopy images used as guidance to perform energy dispersive X-ray spectroscopy (EDX) point measurements of culture J5 after nearly 10 months of incubation (295 days) and of freshly prepared medium without inoculum. Scale bars represent 2 μm. Symbols in the SEM images indicate EDX point measurements (crosses for crystals, triangles for disordered structure). (B) Atom percent ratio of iron (red) and sulfur (yellow) as derived from EDX point measurements of euhedral crystals resembling pyrite as well as disordered structures resembling the sum of the remaining Fe-S-mineral phase. Measurements were done on eight different sampling areas with three EDX point measurements each.



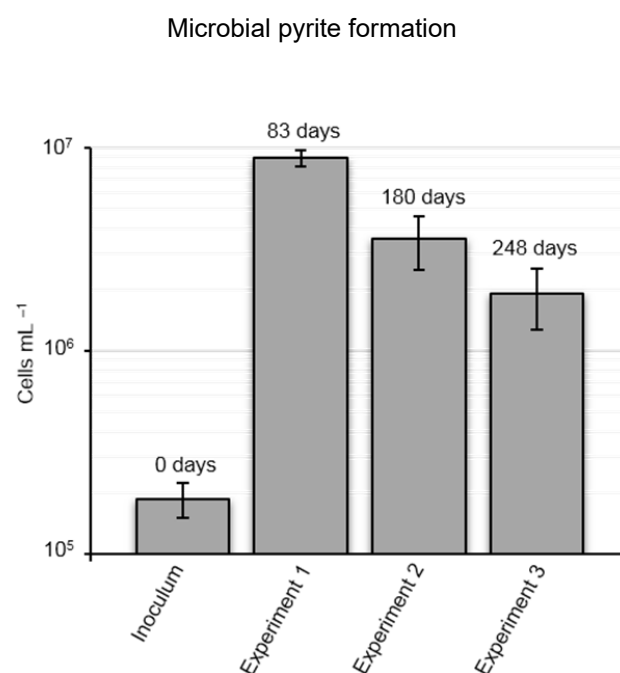

593

594 Figure S3. Average cell counts of culture J5 as based on DAPI-stained cells in three  
 595 independent incubation experiments at 28°C as compared to freshly inoculated medium. The  
 596 time of incubation is indicated in days. Data was obtained from biological duplicates, each  
 597 measured in technical triplicates. Standard deviations are given for technical replicates.

# Microbial pyrite formation

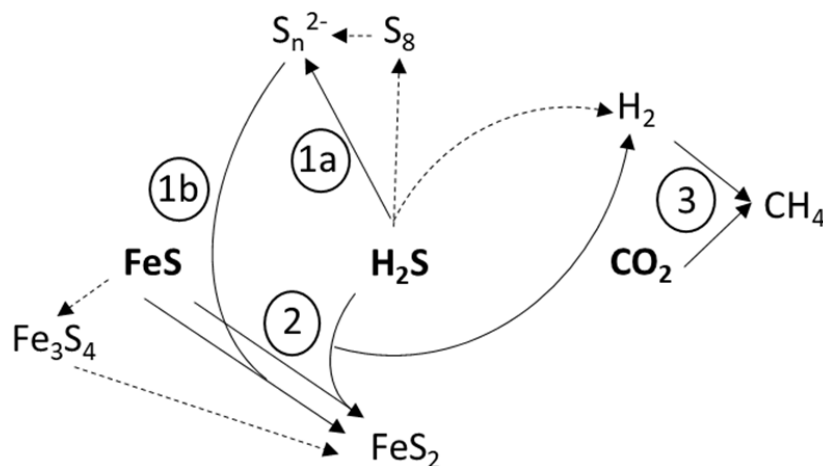

598

599 Figure S4. Schematic overview of potential  $FeS_2$  formation pathways in culture J5. The  
600 scheme illustrates pyrite formation either by a combination of sulfide oxidation to zero-valent  
601 sulfur (1a) coupled to the polysulfide pathway (1b) or by the  $H_2S$  pathway (2). The released  
602 reducing equivalents are likely transferred in the form of  $H_2$  to methanogenesis (3) to reduce  
603  $CO_2$  to  $CH_4$ . Dashed lines leading to *cyclo*-octasulfur ( $S_8$ ) and greigite ( $Fe_3S_4$ ) represent  
604 potential alternative pathways or side reactions, respectively.
